# Supplementary material for: Identification of Serum Metabolites as Prognostic Biomarkers Following Spinal Cord Injury: A Pilot Study
Source: MDPI journal article supplement (doi:10.3390/metabo13050605), 2023-04-28
Supplement: s1 [file s1]

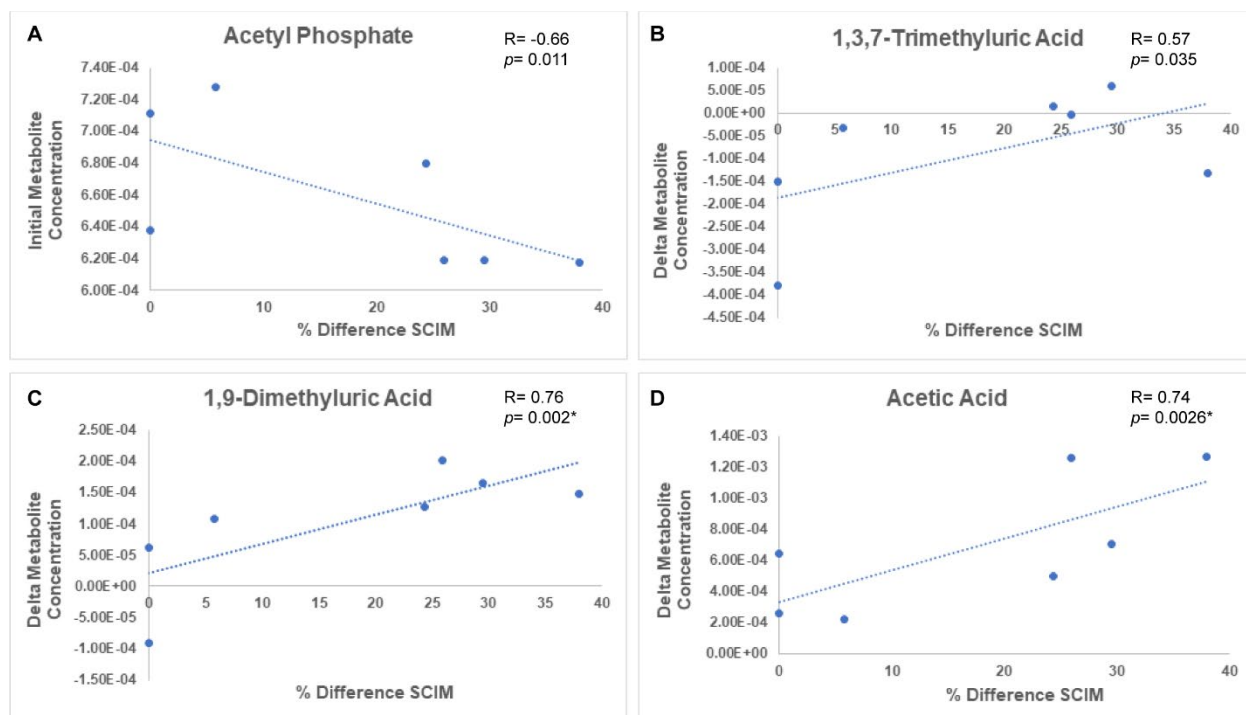

**Supplementary Figure S1.** Pearson correlation scatterplots are illustrated for  $n=7$  male participants with associated Pearson correlation coefficient values and  $P$ -values for two comparisons: first, correlating initial acetyl phosphate concentration to the percent difference in SCIM scores (A) and second, correlating change (delta) in 1,3,7-trimethyluric acid, 1,9-dimethyluric acid, and acetic acid to the percent difference in SCIM scores (B-D, respectively). The x-axis provides the percent difference in SCIM score, with larger numbers indicating a greater improvement. A higher value on the y-axis represents a higher initial metabolite concentration (A) or a larger change in metabolite concentration from the initial to the 6-month time point (B-D). Starred  $p$ -values indicate significance after Bonferroni correction ( $\alpha=0.0038$ ).
